1 **Antimicrobial Efficacy and Safety of a Novel Gas Plasma-Activated**  
2 **Catheter Lock Solution**

3

4 Running Title: gas plasma-activated catheter lock solution

5

6 Sudhir Bhatt<sup>1</sup>, Poonam Mehta<sup>1</sup>, Chen Chen<sup>2</sup>, Dayle A. Daines<sup>3</sup>, Leonard A. Mermel<sup>4</sup>,  
7 Hai-Lan Chen<sup>1</sup> and Michael G. Kong<sup>1,5</sup>

8

9 <sup>1</sup>*Center for Bioelectrics, Old Dominion University, Norfolk VA 23508, USA*

10 <sup>2</sup>*State Key Lab of Electrical Insulation and Power Equipment, Center for Plasma*  
11 *Biomedicine, Xi'an Jiaotong University, Xi'an, Shaanxi 710049, China*

12 <sup>3</sup>*Department of Biological Sciences, Old Dominion University, Norfolk, VA 23529, USA*

13 <sup>4</sup>*Department of Medicine, Warren Alpert Medical School of Brown University and*  
14 *Division of Infectious Diseases, Rhode Island Hospital, Providence RI 02903, USA*

15 <sup>5</sup>*Department of Electrical and Computer Engineering, Norfolk VA 23529, USA*

16

17 Corresponding authors: H. L. Chen ([h1chen@odu.edu](mailto:h1chen@odu.edu)) and M. G. Kong  
18 ([mkong@odu.edu](mailto:mkong@odu.edu)), Center for Bioelectrics, Old Dominion University, Norfolk, VA 23508,  
19 USA

20 Key words:

21 Gas plasma-activated disinfectant, catheter, lock solution, central venous catheter,  
22 central line associated bloodstream infection.

23

24 **ABSTRACT**

25 Antimicrobial lock solutions are important for prevention of microbial colonization and  
26 infection of long-term central venous catheters. We investigated the efficacy and safety  
27 of a novel antibiotic-free lock solution formed from gas plasma-activated disinfectant  
28 (PAD). Using a luminal biofilm model, viable cells of methicillin-resistant *Staphylococcus*  
29 *aureus*, *Staphylococcus epidermidis*, *Pseudomonas aeruginosa*, and *Candida albicans*  
30 in mature biofilms were reduced by 6 – 8 orders of magnitude with a PAD lock for 60  
31 minutes. Subsequent 24-hour incubation of PAD-treated samples resulted in no  
32 detectable regrowth of viable bacteria or fungi. As a comparison, the use of a  
33 minocycline/EDTA/ethanol lock solution for 60 minutes led to regrowth of bacteria and  
34 fungi, up to  $10^7$  –  $10^9$  CFU/ml, in 24 hours. The PAD lock solution had minimal impact  
35 on human umbilical vein endothelial cell viability, whereas the  
36 minocycline/EDTA/ethanol solution elicited cell death in nearly half of human endothelial  
37 cells. Additionally, PAD treatment caused little topological change to catheter materials.  
38 In conclusion, PAD represents a novel antibiotic-free, non-cytotoxic lock solution that  
39 elicits rapid and broad-spectrum eradication of biofilm-laden microbes and which shows  
40 promise for the prevention and treatment of intravascular catheter infections.

41

42

43

44

45

46

47 **INTRODUCTION**

48 Central venous catheters (CVCs) provide long-term access to medication and total  
49 parenteral nutrition for cancer, hemodialysis, short-gut, and transplant patients. The  
50 majority of bloodstream infections in long-term CVCs (>10 days) is associated with  
51 intraluminal microbial colonization (1,2). Current management guidelines for catheter-  
52 related bloodstream infections (CRBSIs) recommend use of antimicrobial lock therapy  
53 (ALT) for catheter salvage (3). Even with antibiotics at concentrations 1,000-fold above  
54 the systemic therapeutic dose, current ALT may be ineffective in eradicating mature  
55 bacterial and fungal biofilms (4-7). In addition, leakage of antimicrobial lock solutions  
56 into the bloodstream has been implicated in systemic toxicity in patients with long-term  
57 CVCs, potential for increased biofilm formation, as well as adverse effects on the  
58 catheter integrity and intraluminal precipitation (5-6,8-9).

59 After three decades of optimizing their utility in catheter lock solutions, reliance on  
60 current antibiotics is fundamentally challenged by the limited scope to improve the  
61 trade-off between efficacy and toxicity (6,7,10) and by the potential risk of antimicrobial  
62 resistance (11). Inspired by the way that endogenous reactive oxygen species (ROS)  
63 are released by immune cells of a mammalian host to inactivate invading bacteria,  
64 extensive studies have shown that exogenous reactive oxygen and nitrogen species  
65 (RONS) and other antimicrobial effectors (e.g. transient charges) generated by gas  
66 plasmas effect rapid inactivation of bacteria and fungi (12-14). In addition, RONS from  
67 gas plasmas can be designed to be selective against microbes with little harm to  
68 mammalian host (15,16).

69 We recently developed a novel gas plasma-activated disinfectant (PAD) as a  
70 novel catheter lock solution. The aim of the current study was to determine the efficacy  
71 of PAD against bacteria and fungi in a catheter biofilm model and to assess the effect of  
72 PAD on primary human umbilical vein endothelial cells (HUVEC) as an *in vitro* model of  
73 blood vessel endothelium. In doing so, we compared the PAD to a novel antibiotic-  
74 antiseptic lock solution.

75

## 76 **MATERIALS AND METHODS**

### 77 **Catheter lock solutions**

78 Minocycline hydrochloride (3 mg/ml) and EDTA (30 mg/ml) were mixed in 25% ethanol  
79 (M-EDTA-25E), as a comparator lock solution (17). PAD was formed by treating 5 ml of  
80 normal saline (NaCl) for 2 minutes with a room-temperature gas plasma system at 3.2  
81 W in ambient air (18, Figure 1). Untreated saline was used as a control.

82

### 83 **Microorganisms and luminal biofilm model**

84 MRSA BAA-1707, *P. aeruginosa* BAA-47 and *C. albicans* 14053 (ATCC, Manassas, VA)  
85 were used to test antimicrobial efficacy of PAD. Additionally, PAD was tested with  
86 clinical isolates of MRSA (SO385), *S. epidermidis* (M0881) and *C. albicans* (BEI,  
87 Manassas, VA), as well as a laboratory control strain of *P. aeruginosa* 27853 (ATCC,  
88 Manassas, VA). MRSA and *S. epidermidis* were grown on Luria-Bertani (LB) agar, *P.*  
89 *aeruginosa* on Brain Heart Infusion (BHI) agar, and *C. albicans* on Yeast-Malt (YM) agar.  
90 A single colony was inoculated into 10 ml of appropriate broth, incubated overnight at  
91 37°C while shaking at 160 rpm, harvested at mid-logarithmic phase growth by

92 centrifugation (500 x g, 5 min), then washed twice with 1xPBS. The inoculum  
93 concentration was adjusted to  $1.0 - 2.0 \times 10^7$  CFU/ml by broth dilution.

94 We modified a luminal biofilm model (4,19) using sterile silicone tubing of 1.58  
95 mm ID, 3.175 mm OD (NewAge, Southampton, PA). Silicone tubing segments, 305 mm  
96 in length, were sterilized and inoculated with approximately 600  $\mu$ l of a prepared  
97 microbial culture using a sterile syringe. Each inoculated catheter was sealed with a  
98 sterile, tight-fitting PTFE plug, placed in a sterile Petri dish, and incubated without  
99 shaking for 24 or 48 hours at 37°C. Inoculated segments were gently flushed with  
100 normal saline, removing non-adherent microorganisms and leaving intact biofilm.

101

#### 102 **Eradication and regrowth assays**

103 In the eradication assay, 600  $\mu$ l of a test lock solution was slowly injected into the lumen  
104 of each inoculated segment using a syringe. Segments were then incubated at 37°C for  
105 15 – 360 minutes. After incubation, the external surface of each segment was  
106 thoroughly swabbed with 70% (v/v) ethanol and allowed to air dry to ensure that only  
107 luminal microbes were recovered. Luminal contents were removed with a gentle saline  
108 flush, each segment was then cut into three segments of 101.6 mm and submerged in 2  
109 ml of 0.1 M glycine buffer (pH 7.0). Each of these segments was then vortexed for 1  
110 minute, sonicated at 40 kHz for 1 minute in a room temperature water bath, then  
111 vortexed for an additional minute. Luminal contents were then serially diluted and  
112 colony counts were enumerated using a plate counter (detection limit 10 CFU/ml).

113 To evaluate microbial regrowth, catheter segments from each eradication  
114 treatment were placed in a sterile 15 mil Falcon tube filled with 2 ml of appropriate broth

115 and incubated overnight with shaking at 37°C. Following incubation, segments were  
116 vortexed for 1 minute, then sonicated for 1 minute. A 200 µl aliquot of sonicated broth  
117 was used for serial dilution and plating. Plates were incubated overnight at 37°C before  
118 colony enumeration.

119

## 120 **Biofilm Dispersal Assay**

121 Glass chamber slides (Thermo Fisher Scientific, Fair Lawn, NJ) were inoculated with  
122 500 µl of microbial cultures at  $1.0 - 2.0 \times 10^7$  CFU/ml and then incubated for 24 hours to  
123 form biofilm on the surface of the slides. To remove planktonic cells, the medium was  
124 aspirated off and the biomass washed three times with 1 ml of 1x PBS. Following gentle  
125 washing, biofilms were treated with 200 µL of lock solution for 60 minutes. Before and  
126 after exposure to the lock solution, various wells of the inoculated slides were stained  
127 with crystal violet (BD, Franklin Lakes, NJ) for imaging and quantification of any  
128 adherent material (20). Adherent material on the glass slides was quantified by means  
129 of optical absorption at 590 nm.

130

## 131 **Cytotoxicity Assay**

132 To assess for cytotoxicity of inadvertently spilled test lock solutions, we used HUVEC  
133 (Lonza, Walkersville, MD) with the MTT (3-(4,5-Dimethylthiazol-2-yl)-2,5-  
134 Diphenyltetrazolium Bromide) assay using the Vybrant<sup>®</sup> MTT Cell Proliferation Assay Kit  
135 (Invitrogen, CA, USA) according to the manufacturer's instruction. Briefly, HUVECs  
136 were seeded in endothelial basal medium (Lonza, Walkersville, MD) at 200 µl/well in 96-  
137 well plates at a density of  $1.0 \times 10^5$  cells/ml one day prior to a cytotoxicity test. To

138 determine the volume of test lock solution to treat HUVECs, we used the algorithm that  
139 the maximum lock solution escaping from a CVC is approximately 0.5 ml per event (21)  
140 and this solution is distributed in the amount of blood pumped in 1 – 2 heart beats (22),  
141 which is approximately 100 ml in a healthy adult. This corresponds to a lock solution-  
142 blood ratio of up to approximately 0.5% per spill. Given this, each test lock solution was  
143 mixed at 0.1 – 0.5% of the cell medium in each HUVEC-containing well of the 96-well  
144 plates. Untreated HUVECs served as controls.

145

#### 146 **Measurements of Reactive Species**

147 Long-lived RONS in PAD at 37°C were measured with a microplate reader (FLUOStar,  
148 BMG Labtech, NC, USA) with the Amplex Red assay kit (Thermo Fisher Scientific, MA,  
149 USA) for H<sub>2</sub>O<sub>2</sub> and the Griess Reagent assay (Cayman Chemical Co, MI, USA) for  
150 nitrite (NO<sub>2</sub><sup>-</sup>) and nitrate (NO<sub>3</sub><sup>-</sup>). Similarly, short-lived RONS were measured at 37°C  
151 with an electron spin resonance (ESR) spectrometer (EMX+, Bruker, Germany) and  
152 spin traps (18). Specifically, DMPO (5,5-Dimethyl-1-Pyrroline N-oxide) was used for  
153 trapping hydroxyl radicals (·OH), and DTCS (diethyldithiocarbamate) and MGD (N-  
154 methyl-D-glucamine dithiocarbamate) for trapping nitric oxide (NO·; all from Dojindo  
155 Laboratories, Kumamoto, Japan). Superoxide (O<sub>2</sub><sup>-</sup>) and peroxynitrite (ONOO<sup>-</sup>) were  
156 trapped using TEMPONE-H (1-hydroxy-2,2,6,6-tetramethyl-4-oxo-piperidine  
157 hydrochloride, from Enzo Biochem, NY, USA). The ESR detection limit was  
158 approximately 100 nM.

159

#### 160 **Surface characterization**

161 Surface topology of the inner wall of silicone catheter tubing was examined using a  
162 JSM-6060LV scanning electron microscopy (SEM; JEOL, Japan). To mimic prolonged  
163 exposure, tubing segments were locked with 600  $\mu$ L of PAD for 2 hours at 37°C. Then,  
164 lock solutions were replenished with 600  $\mu$ L of freshly prepared PAD for another 2 hours  
165 at 37°C. This was repeated consecutively 5 times in a day. After the last 2-hour  
166 treatment, test segments were locked with freshly prepared PAD overnight (~ 14 hours)  
167 at 37°C. The treatment procedure lasted for 7 days. As controls, segments of silicone  
168 tubing were locked with normal saline with the same procedure for lock solution  
169 replacement and untreated segments were stored at 37°C, both for 7 days. Following  
170 the treatment, tubing segments were cut open and the inner surface of each segment  
171 was gold-coated and examined with SEM at a working voltage of 15 kV.

172

### 173 **Statistical Analysis**

174 All test conditions were studied in at least three independent experiments. Data are  
175 presented as mean  $\pm$  SD. The Student's *t* test was used to determine significance  
176 between data points.

177

## 178 **RESULTS**

### 179 **Transient reactive oxygen and nitrogen species**

180 Diverse reactive oxygen and nitrogen species in PAD was observed with all long-lived  
181 RONS at a low concentration, with peak values at 10 – 300  $\mu$ M (Figure 1). The peak  
182 concentration of a given reactive species in PAD was markedly below the minimum  
183 inhibitory concentration (MIC) of the species when acting alone. For example, the MICs



184 of  $\text{H}_2\text{O}_2$  and  $\text{ONOO}^-$  are both 1 – 10 mM for *E. coli* (23, 24) and these are approximately  
185 3 orders of magnitude above the peak concentrations of  $\text{H}_2\text{O}_2$  and spin-trap adducts of  
186  $\text{H}_2\text{O}_2$  (10  $\mu\text{M}$ ) and  $\text{ONOO}^-$  (7  $\mu\text{M}$ ) found in PAD (Figure 1). Figure 1 shows half-lives of  
187 30 – 45 minutes for  $\text{H}_2\text{O}_2$ ,  $\text{NO}_2^-$  and  $\text{ONOO}^-$  as well as plasma-induced acidification (pH  
188 = 3) with which the main reactive chlorine species was hypochlorous acid (HOCl) below  
189 100 nM in air plasma-activated saline of greater than 1 mm in thickness (25), 3 orders of  
190 magnitude below its MIC of approximately 12.5  $\mu\text{M}$  against *S. aureus* (26). Peak  
191 concentrations of  $\text{NO}_2^-$  (30  $\mu\text{M}$ ) and  $\text{NO}_3^-$  (300  $\mu\text{M}$ ) were much lower than their MICs  
192 (>0.5 mM for  $\text{NO}_2^-$  and >10 mM for  $\text{NO}_3^-$ ) (27) and cytotoxicity dose (>18 mM for  $\text{NO}_3^-$ )  
193 (28). Together, antimicrobial reactive species in PAD were at least 3 orders of  
194 magnitude below their individual MICs and were transient; with  $\text{H}_2\text{O}_2$ ,  $\text{NO}_2^-$  and  $\text{ONOO}^-$   
195 half-lives of 30 – 45 minutes. Fundamentally distinct from antibiotics, PAD is  
196 characterized by chemical diversity of many RONS, each at low concentrations and  
197 decaying rapidly within one hour.

198

### 199 **Antimicrobial and Antibiofilm Efficacy**

200 From an initial microbial load of  $10^7$ - $10^8$  CFU/ml, the PAD lock eradicated 24-hour  
201 luminal biofilms of *MRSA* (BAA-1707) and *P. aeruginosa* (BAA-47) within 30 minutes  
202 and *C. albicans* 14053 within 45 minutes (Table 1A). Complete suppression of regrowth  
203 in the segment lumens was confirmed at 24 hours after an extended lock of 45 minutes  
204 for bacteria and 60 minutes for *C. albicans* (Table 1B). However, the M-EDTA-25E  
205 treatment left a residual bacterial population of 3.0 – 3.5  $\log_{10}$  CFU/ml with 30-minute  
206 incubation and a residual fungal population of 3.5  $\log_{10}$  CFU/ml with 60-minute

207 incubation (Table 1A). Furthermore, 24-hour incubation of segment lumens treated with  
208 M-EDTA-25E lock solution for 60 minutes led to recovery of *P. aeruginosa* and *C.*  
209 *albicans*, both to approximately 4.4 log<sub>10</sub> CFU/ml (Table 1B). Against clinical isolates,  
210 PAD lock for 60 minutes led to a 6-8 log reduction of all bacterial and fungal test  
211 microorganisms (Table 2A) and complete suppression of regrowth (Table 2B). The  
212 same 60-minute exposure to M-EDTA-25E lock solution resulted in approximately 2.8  
213 log<sub>10</sub> CFU/ml of MRSA and *S. epidermidis* and 4.3 log<sub>10</sub> CFU/ml of *C. albicans* in  
214 segment lumens (Table 2A). Microbial recovery with M-EDTA-25E reached the initial  
215 luminal inoculum of 7 – 9 log<sub>10</sub> CFU/ml (Table 2B).

216 A detailed comparison between PAD and M-EDTA-25E was made for eradication  
217 and regrowth of *C. albicans* 14053 with extended lock times up to 360 minutes.  
218 Complete regrowth inhibition of *C. albicans* biofilm required 360 min with M-EDTA-25E,  
219 while a lock time of 60 minutes was needed for PAD (Table 3). Efficacy with 60-minute  
220 PAD lock solution was confirmed against 48-hour biofilms tested against microbes listed  
221 in Table 1 (data not shown).

222 To confirm effective biofilm dispersal, Figure 2A shows that 60-minute exposure  
223 to PAD removed adhesive materials from inoculated glass slides with MRSA BAA-1707  
224 and *C. albicans* 14053. By contrast, M-EDTA-25E exposure for 60 minutes led to  
225 considerable biomass remaining on glass slides (Figure 2A). Since adherent matter of *P.*  
226 *aeruginosa* biofilms was most difficult to remove (Figure 2B), their dispersal by PAD and  
227 M-EDTA-25E was quantified by means of optical absorption at 590 nm of the biofilm-  
228 infected glass slides (20). PAD exposure for 60 minutes reduced the optical absorption

229 to approximately 1% compared to approximately 41% achieved with M-EDTA-25E  
230 (Figure 2B).

231

### 232 **Cytotoxicity to Primary Human Cells**

233 Figure 3 shows that a simulated spill of PAD minimally affected the viability of HUVECs  
234 at all evaluation points of 0.5, 2, 15, and 24 hours. For the lock-to-medium ratio at both  
235 0.1% and 0.5%, there was no statistically significant difference in the viability between  
236 treated and untreated HUVECs at 24 hours, suggesting an effective repair of initial  
237 minor injuries in PAD-treated human cells. In contrast, the same amount of spilled M-  
238 EDTA-25E damaged HUVECs with cell viability clearly lower at the lock-to-medium ratio  
239 of 0.5% than 0.1%. Viability of HUVECs treated with M-EDTA-25E became  
240 progressively decreased with the incubation time, suggesting an accumulation of  
241 unrepaired injury. For the case of 24-hour incubation when necessary repairs of cellular  
242 damage should have taken place, cell viability was 59% for M-EDTA-25E at the lock-to-  
243 medium ratio of 0.5%, suggesting cell death.

244

### 245 **PAD effects on silicon catheter surface morphology**

246 To test if the RONS in acidified PAD (Figure 1) impacts on catheter material after  
247 repeated PAD locking, we performed an accelerated aging test by continuously locking  
248 segments of catheter tubing for 7 days with regularly replenished PAD. In practice,  
249 PAD locking for 2 hours per day is sufficient to ensure complete suppression of  
250 microbial regrowth (Tables 1 and 2). There was no evidence of any episodes of fissures,  
251 cracks, or other morphological abnormalities in PAD-treated catheter tubes (Figure 4).

252

253

## 254 **DISCUSSION**

255 Our study demonstrates that PAD lock solution is effective against microbial biofilms  
256 implicated in CRBSI with minimal cytotoxicity to primary human vein epithelial cells.  
257 Exposure to PAD lock for 60 minutes led to 6 – 8 order of magnitude reduction of viable  
258 bacterial and fungal biofilms and completely suppressed their regrowth. Similarly, PAD  
259 lock exposure for 60 minutes substantially reduced all adherent matter on glass slides  
260 inoculated with MRSA or *C. albicans*. For *C. albicans* 14053, M-EDTA-25E required 6  
261 hours to achieve similar eradication and regrowth suppression. This is broadly in line  
262 with the capability of current ALT that generally requires prolonged lock times (29,30).

263 Variable efficacy has been reported for current ALT and antifungal lock therapy  
264 (A<sub>f</sub>LT) (29,30). For PAD therapy, effective lock times were approximately 60 minutes  
265 against the Gram-positive and Gram-negative bacteria, and *C. albicans* we studied  
266 (Table 1, 2 and Figure 2). This suggests that PAD therapy can be applied prior to  
267 identification of pathogens that may be involved in a suspected CRBSI episode. The  
268 broad-spectrum antimicrobial properties of PAD are based on chemical diversity of  
269 reactive oxygen, nitrogen and chlorine species (31), and collectively capable of  
270 attacking different cellular targets (13,14) with minimal risk of systemic toxicity (Figure 3)  
271 or damage to silicone catheters (Figure 4).

272 An additional advantage of PAD is that we found minimal toxicity upon exposure  
273 to primary human umbilical vein endothelial cells. This is likely benefited from pulsed  
274 RONS of PAD (Figure 1) with which oxidative stresses to HUVECs are transient and as

275 such are more easily repaired than chemicals that generate reactive oxygen species in  
276 living tissues for many months (32). Furthermore, continuous PAD locking for 7 days did  
277 not result in any morphological abnormalities of silicone such as fissures, cracks or  
278 damage when imaged using SEM (Figure 4). The maximum daily exposure of a CVC to  
279 PAD is 2 hours, and as such, the impact of continuous PAD locking for 7 days would be  
280 equivalent to that of a 2-hour daily PAD therapy on an indwelling CVC for 84 hospital  
281 days ( $=7 \times 24 / 2$ ).

282 Potential limitations to this study reflect the limited number of microbes included,  
283 studies were not carried out in plasma or serum, only silicone material was tested and  
284 additional testing was not performed to assess the impact of our PAD lock solution on  
285 the silicone tubes (e.g., testing the modulus of elasticity, force at break, and maximum  
286 stress at break).

287 PAD lock solution is free of antibiotics and the mechanism of action does not  
288 involve specific binding sites on bacteria or fungi, thereby minimizing the risk of  
289 selecting for antimicrobial resistance (11). In this context, it is of interest to note that a 2  
290 hour exposure to a non-antibiotic containing, nitroglycerin-based lock solution reduces  
291 bacteria and fungal intraluminal biofilms by 4 orders of magnitude (19,34). Nitroglycerin  
292 produces reactive oxygen and nitrogen species (35) and this may explain why its  
293 activity against bacteria and fungi is similarly broad spectrum to PAD. Taken together,  
294 PAD lock therapy may be an innovative addition to current ALT and A/LT.

295

296 **ACKNOWLEDGEMENT**

297 The authors declare no conflict of interest. HLC and MGK acknowledge support from  
298 Old Dominion University, USA.  
299

## 300 REFERENCES

- 301 1. Raad I, Hachem R, Hanna H, Bahna P, Charzinikolaou, Fang X, Jiang Y,  
302 Chemaly RF, Rolston K. 2007. Sources and outcome of bloodstream infections in  
303 cancer patients: the role of central venous catheters. *Eur J Clin Microbiol Infect*  
304 *Dis* 26: 549 – 556.
- 305 2. Worth LJ, Slavin MA. 2009. Bloodstream infections in haematology: Risks and  
306 new challenges for prevention. *Blood Rev* 23: 113 – 122.
- 307 3. Marschall J, Mermel LA, Fakhri M, Hadaway L, Kallen A, O'Grady NP, Pettis AM,  
308 Rupp ME; Sandora T, Maragakis LL, Yokoe DS. 2014. Strategies to prevent  
309 central line-associated bloodstream infections in acute care hospitals. *Infect*  
310 *Control Hosp Epidemiol.* 35: 753 – 771.
- 311 4. Shah CB, Mittelman MW, Costerton JW, Parenteau S, Pelak M, Arsenault R,  
312 Mermel LA. Antimicrobial activity of a novel catheter lock solution. 2002.  
313 *Antimicrob Agent Chemother.* 46: 1674 – 1679.
- 314 5. Ramos ER, Reitzel R, Jiang Y, Hachem RY, Chaftari AM, Chemaly RF, Hackett  
315 B, Pravinkumar SE, Nates J, Tarrand JJ, Raad II. 2011. Clinical effectiveness and  
316 risk of emerging resistance associated with prolonged use of antibiotic-  
317 impregnated catheters: More than 0.5 million catheter days and 7 years of clinical  
318 experience. *Crit Care Med.* 39: 245 – 251.
- 319 6. Niyyar VD, Lok CE. Pros and cons of catheter-lock solutions. 2013. *Curr Opin*  
320 *Nephrol Hypertens.* 22: 669 – 74.

- 321 7. Zakhour R, Chaftari AM, Raad I. 2016. Catheter-related infections in patients with  
322 haematological malignancies: Novel preventative and therapeutic strategies.  
323 *Lancet Infect Dis*; 16: e241 – e 250.
- 324 8. Mermel LA, Alang N. Adverse effects associated with ethanol catheter lock  
325 solutions: A systematic review. *J Antimicrob Chemother* 69: 2611 – 2619, 2014.
- 326 9. Luther MK, Bilida S, Mermel LA, LaPlante KL. Ethanol and isopropyl alcohol  
327 exposure increases biofilm formation in *Staphylococcus aureus* and  
328 *Staphylococcus epidermidis*. *Infect Dis Ther* 4:219-226, 2015.
- 329 10. Messing B, Peitra-Cohen S, Debure A, Beliah M, Bernier JJ. 1988. Antibiotic-lock  
330 technique: a new approach to optimal therapy for catheter-related sepsis in home-  
331 parenteral nutrition patients. *J Parenter Enteral Nutr.* 12: 185 - 189.
- 332 11. Spellberg B, Bartlett JG and Gilbert DN. 2013. The future of antibiotics and  
333 resistance. *N Engl J Med.* 368: 299 – 302.
- 334 12. Kong MG, Kroesen G, Morfill G, Nosenko T, Shimizu T, van Dijk J, Zimmermann  
335 JL. 2009. Plasma medicine: an introductory review. *New J Phys.* 11: 115012.
- 336 13. Vatansever F, de Melo WCMA, Avci P, Vecchio D, Sadasivam M, Gupta A,  
337 Chandran R, Karimi M, Parizotto NA, Yin R, Tegos GP, Hamblin MR. 2013.  
338 Antimicrobial strategies centered around reactive oxygen species – bactericidal  
339 antibiotics, photodynamic therapy, and beyond. *FEMS Microbiol Rev.* 37: 955 –  
340 989.
- 341 14. Mai-Prochnow A, Murphy AB, McLean KM, Kong MG and Ostrikov K. 2014.  
342 Atmospheric pressure plasmas: Infection control and bacterial responses. *Int J*  
343 *Antimicrob Agents.* 43: 508 – 517.



- 344 15. Isbary G, Heinlin J, Shimizu T, Zimmermann JL, Morfill G, Schmidt HU, Monetti R,  
345 Steffes B, Bunk W, Li Y, Klaempfl T, Karrer S, Landthaler M, Stolz W. 2012.  
346 Successful and safe use of 2 min cold atmospheric argon plasma in chronic  
347 wounds: results of a randomized controlled trial. *Brit J Dermatol.* 167: 404 – 410.
- 348 16. Xu DH, Cui QJ, Xu YJ, Wang BC, Tian M, Li QS, Liu ZJ, Liu DX, Chen HL, Kong  
349 MG. Systemic study on the safety of immune-deficient nude mice treated by  
350 atmospheric plasma-activated water. *Plasma Sci Technol* 2018; **20**: 044003.
- 351 17. Raad I, Henna H, Dvorak Tm Chaiban G, Hachem R. 2007. Optimal antimicrobial  
352 catheter lock solution, using different combinations of minocycline, EDTA, and 25-  
353 percent ethanol, rapidly eradicates organisms embedded in biofilms. *Antimicrob*  
354 *Agent Chemother.* 51: 78 – 83.
- 355 18. Chen C, Li F, Chen HL, Kong MG. 2017. Aqueous reactive species induced by a  
356 PCB surface microdischarge air plasma device: a quantitative study. *J Phys D:*  
357 *App Phys.* 50: 445208.
- 358 19. Reitzel RA, Rosenblatt J, Hirsh-Ginsberg C, Murray K, Chaftari AM, Hachem R,  
359 Raad I. 2016. *In vitro* assessment of the antimicrobial efficacy of optimized  
360 nitroglycerin-citrate-ethanol as a nonantibiotic, antimicrobial catheter lock solution  
361 for prevention of central line-associated bloodstream infection. *Antimicrob Agent*  
362 *Chemother.* 60: 5175 – 5181.
- 363 20. O'Toole GA. 2011. Microtiter dish biofilm formation assay. *J Vis Exp.* 30: 2437.
- 364 21. Polaschegg HD, Shah C. 2003. Overspill of catheter lock solution: safety and  
365 efficacy aspects. *ASAIO J.* 49: 713 – 715.
- 366 22. Polaschegg HD, Sodemann K. 2003. Risks related to catheter locking solutions

- 367 containing concentrated citrate. *Nephrol Dial Transplant*. 18: 2688 – 2690.
- 368 23. Imlay JA, Linn S. Bimodal pattern of killing of DNA-repair-defective or anoxically  
369 grown *Escherichia coli* by hydrogen peroxide. 1986. *J Bacteriol*. 166: 519 – 527.
- 370 24. Lindemann C, Lupilova N, Muller A, Warscheid B, Meyer HE, Kuhlmann K,  
371 Eisenacher M, Leichert LI. 2013. Redox proteomics uncovers peroxynitrite-  
372 sensitive proteins that help *Escherichia coli* to overcome nitrosative stress. *J Biol*  
373 *Chem*. 288: 19688 – 19714.
- 374 25. Liu ZC, Guo L, Liu DX, Rong MZ, Chen HL, Kong MG. 2017. Chemical kinetics  
375 and reactive species in normal saline activated by a surface air discharge. *Plasma*  
376 *Process Polym*. 14: 1600113.
- 377 26. Wang L, Bassiri M, Najafi R, Najafi K, Yang J, Khosrovi. Hwong W, Barati E,  
378 Belisle B, Celeri C, Robson MC. 2007. Hypochlorous acid as a potential wound  
379 care agent. Part I. Stabilized hypochlorous acid: a component of the inorganic  
380 armamentarium of innate immunity. *J. Burns Wounds*. 6: 65 – 79.
- 381 27. Xia DS, liu T, Zhang CM, Yang SH, Wang SL. 2006. Antimicrobial effect of  
382 acidified nitrate and nitrite on six common oral pathogens *in vitro*. *Chin Med J*.  
383 119: 1904 – 1909.
- 384 28. Clements WT, Lee S-R, Bloomer RJ. 2014. Nitrate ingestion: a review of the  
385 health and physical performances effects. *Nutrients*. 6: 5224 – 5264.
- 386 29. Vassallo M, Dunais B, Roger PM. 2015. Antimicrobial lock therapy in central-line  
387 associated bloodstream infections: a systemic review. *Infection*. 43: 389 – 398.
- 388 30. Walraven CJ, Lee SA. 2013. Antifungal lock therapy. *Antimicrob Agent*  
389 *Chemother*. 57: 1 – 8.

- 390 31. Carlsson S, Wiklund NP, Engstrand L, Weitzberg E, Lundberg JON. 2001. Effects  
391 of pH, nitric, and ascorbic acid on nonenzymatic nitric oxide generation and  
392 bacterial growth in urine. *Nitric Oxide* 5: 580 – 586.
- 393 32. Hu J, Liu Y-F, Wu C-F, Xu F, Shen Z-X, Zhu Y-M *et al.* 2009. Long-term efficacy  
394 and safety of all-trans retinoic acid/arsenic trioxide-based therapy in newly  
395 diagnosed acute promyelocytic leukemia. *Proc Natl Acad Sci USA* 106: 3342 –  
396 3347.
- 397 33. Saivin S, Houin G. 1988. Clinical pharmacokinetics of doxycycline and  
398 minocycline. *Clin Pharmacokinet.* 15: 355–66.
- 399 34. Chaftari AM, Hachem R, Szvalb A, Taremi M, Granwehr B, Viola GM, Sapna A,  
400 Assaf A, Numan Y, Shah P, Gasitashvilli K, Nativdad E, Jiang Y, Slack R, Reizel  
401 R, Rosenblatt J, Mouhayer E, Raad I. 2017. A novel nonantibiotic nitroglycerin-  
402 based catheter lock solution for prevention of intraluminal central venous catheter  
403 infections in cancer patients. *Antimicrob Agent Chemother.* 61: e00091-17.
- 404 35. Wenzel P, Mollnau H, Oelze M, Schulz E, Wickramanayake JMD, Muller J,  
405 Schuhmacher S, Hortmann M, Baldus S, Gori T, Brandes RP, Munzel T, Daiber  
406 A. 2008. First evidence for a crosstalk between mitochondrial and NADPH  
407 oxidase-derived reactive oxygen species in nitroglycerin-triggered vascular  
408 dysfunction. *Antioxid Redox Signal.* 10: 1435 – 1447.
- 409

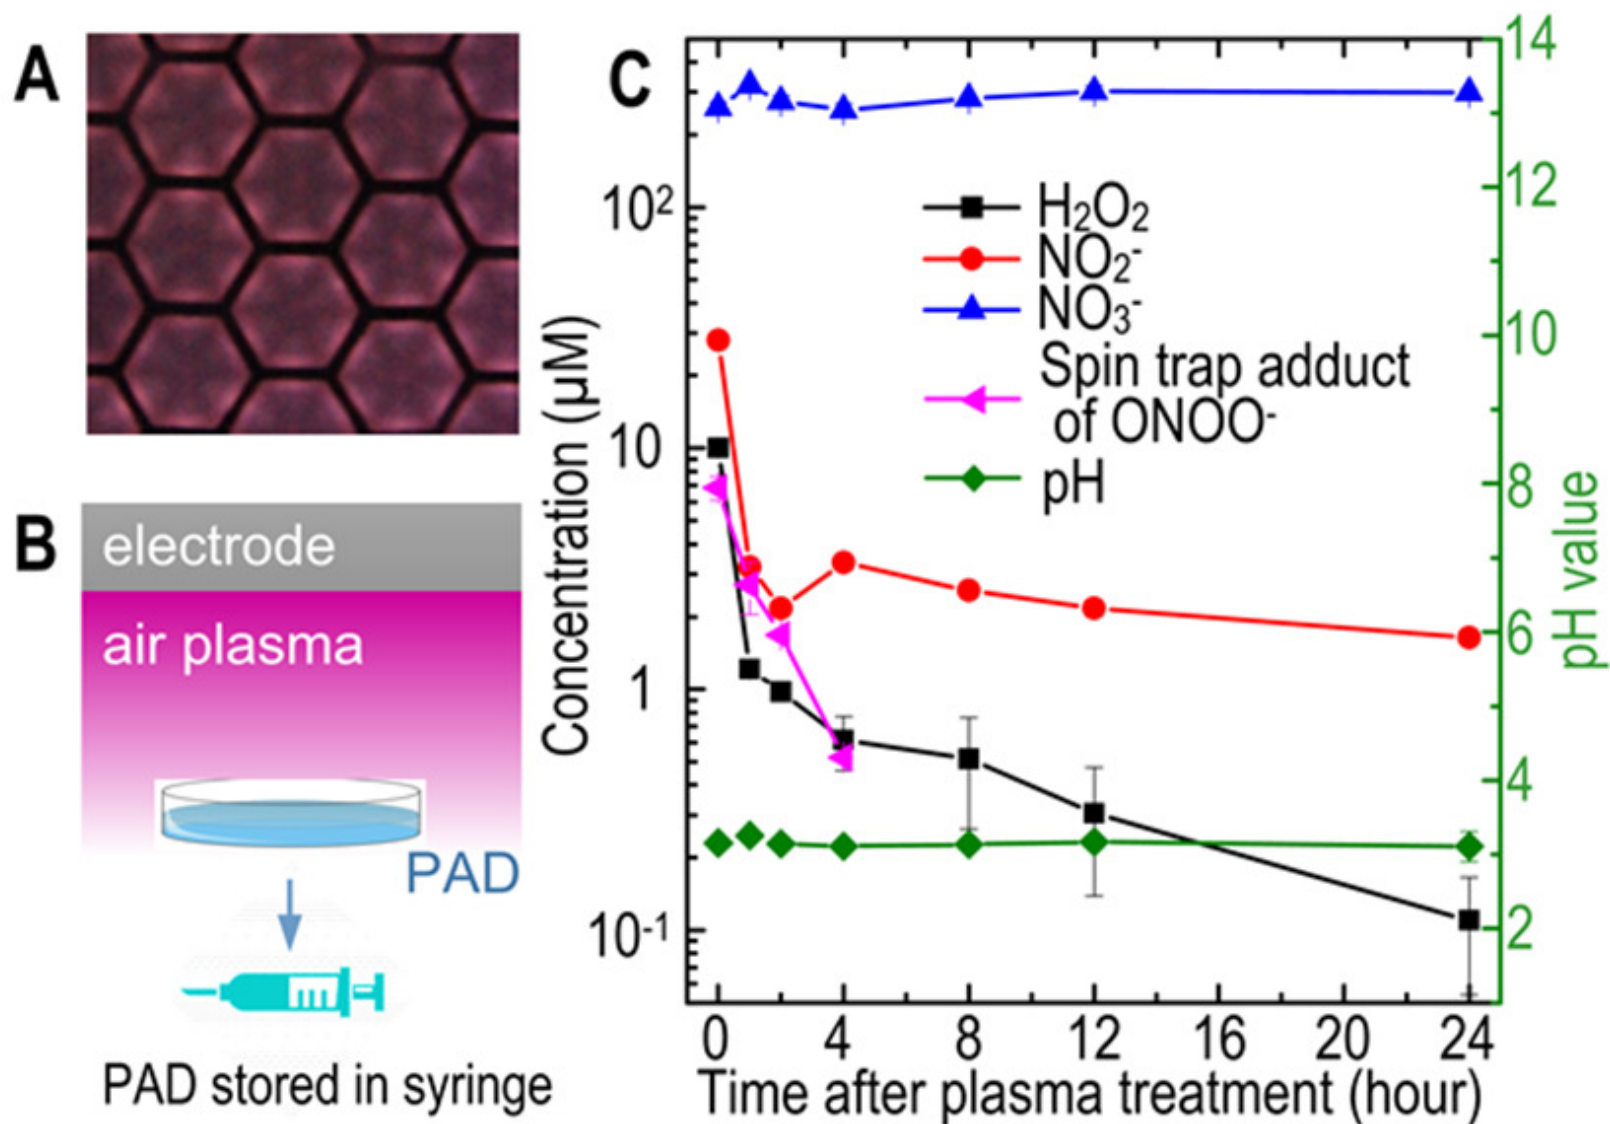

**Figure 1.** (A) End view of an atmospheric air plasma generated on the surface of its hexagon-shaped mesh electrode on a glass slide (in black) with each hexagon metal rim confining one surface discharge plasma (in purple). The air plasma was sustained at a peak-to-peak voltage of 9.4 kV at 23 kHz and a dissipated power density of 3.2 W. (B) A side view schematic of the surface plasma being used to treat 5 ml normal saline in a petri dish downstream from the electrode for 2 min. The resulting PAD was then stored in a sterile syringe. (C) Concentrations of  $\text{H}_2\text{O}_2$ ,  $\text{NO}_2^-$ ,  $\text{NO}_3^-$ , and spin-trap adducts of  $\text{ONOO}^-$  as well as pH of PAD at  $37^\circ\text{C}$  as a function of time after plasma activation of saline.

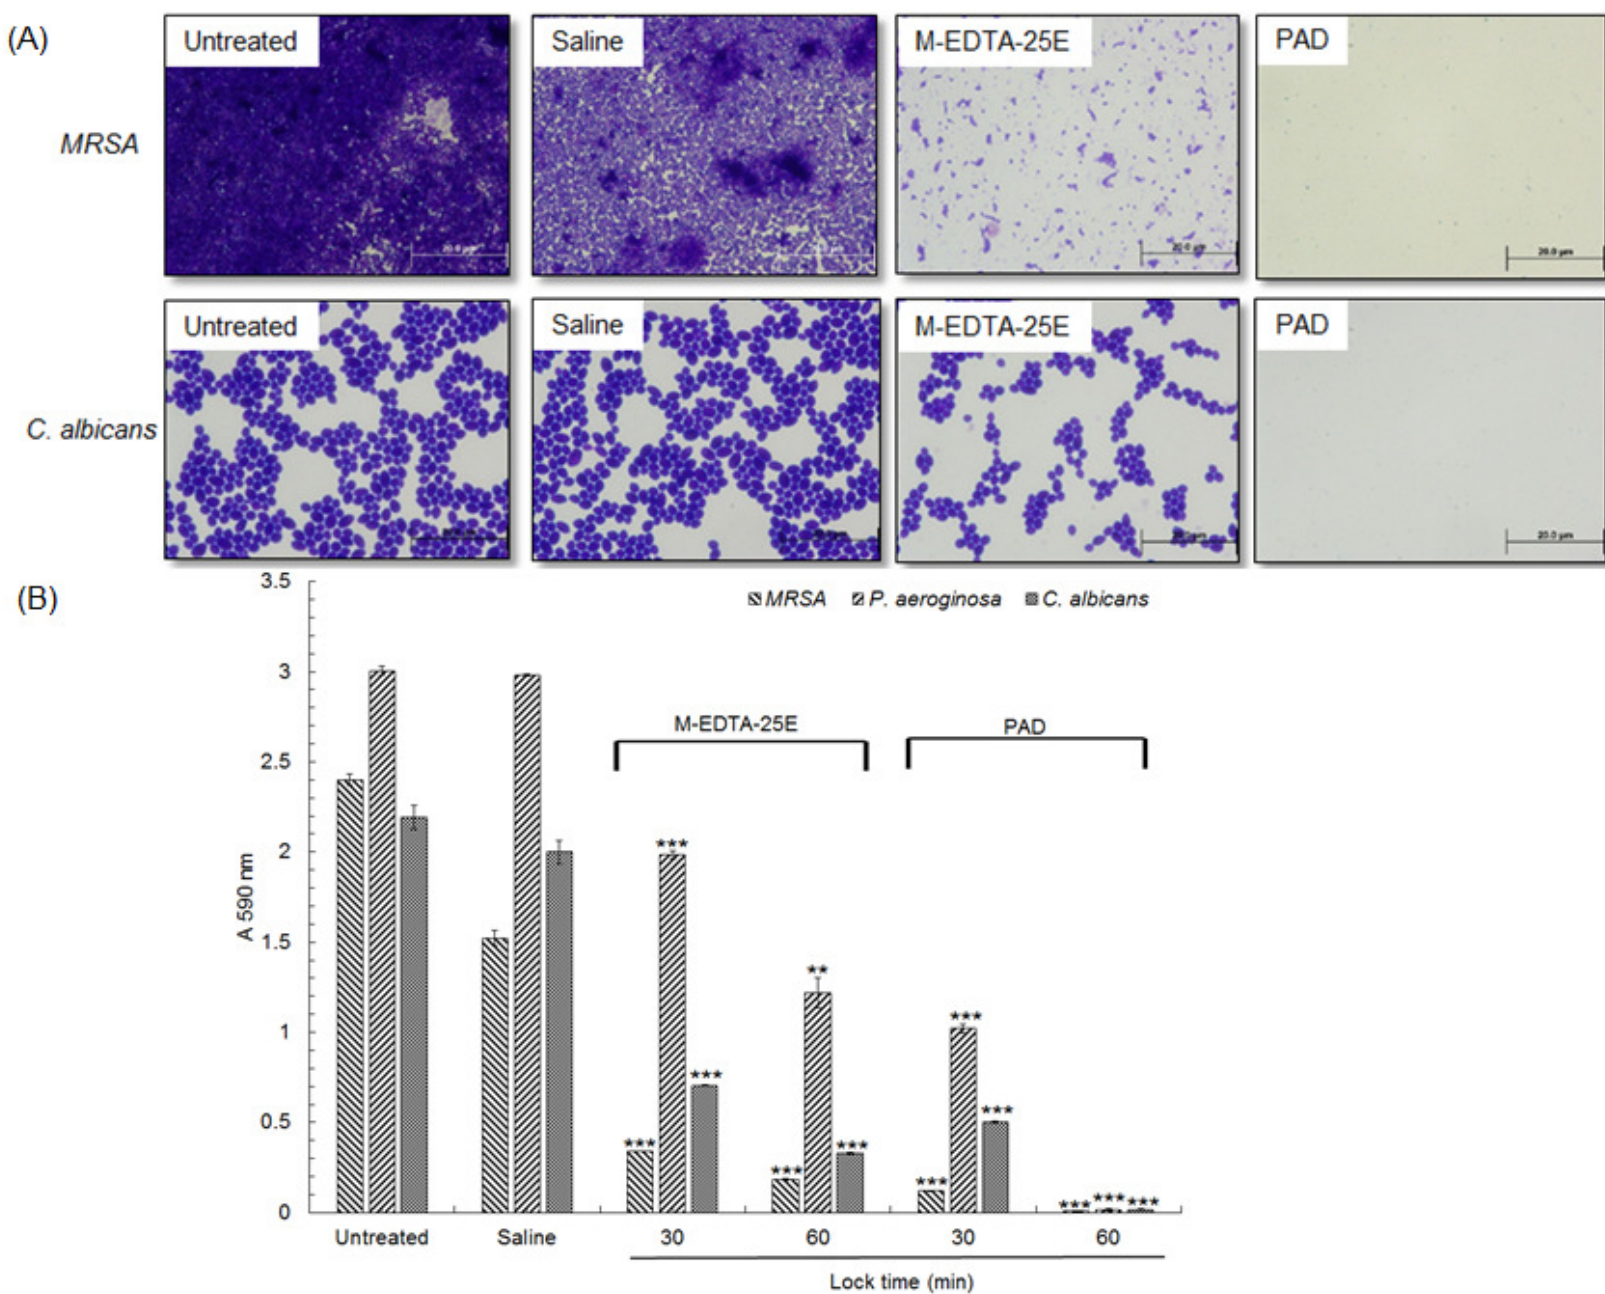

**Figure 2.** (A) Microscopic views of the biofilm formation in glass chambers after crystal violet (CV) staining (lens magnification, X 100) and (B) quantification of CV (B). \*\*\*  $P \leq 0.005$  and \*\*  $P \leq 0.01$  when compared with control.

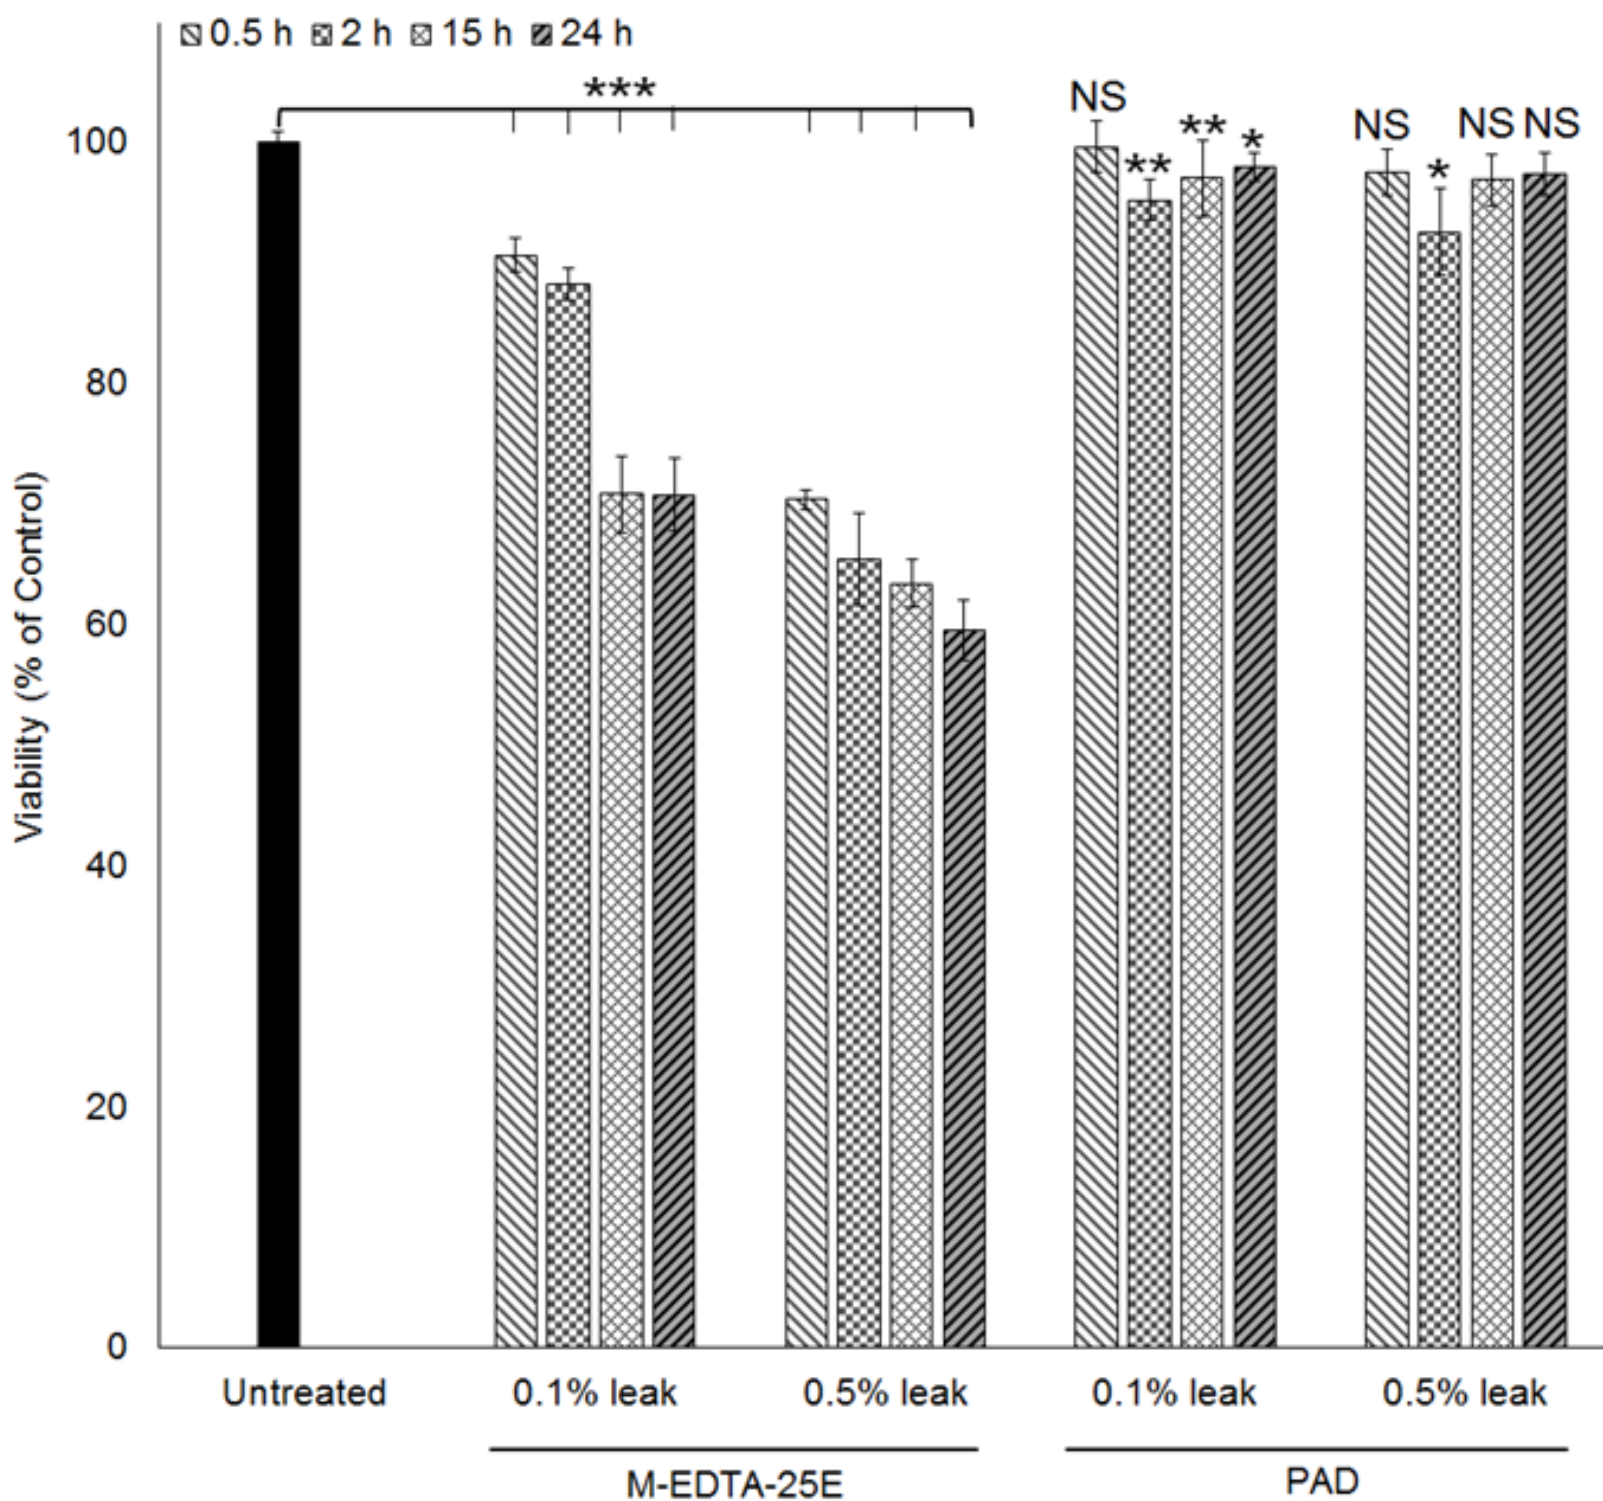

**Figure 3.** Evaluation of potential cytotoxic activity after exposure to HUVECs by leaked lock solution at a solution-to-medium ratio of 0.1% and 0.5%.  $n = 3$ . \*\*  $P \leq 0.01$  and \*  $P \leq 0.05$  when compared with the control.

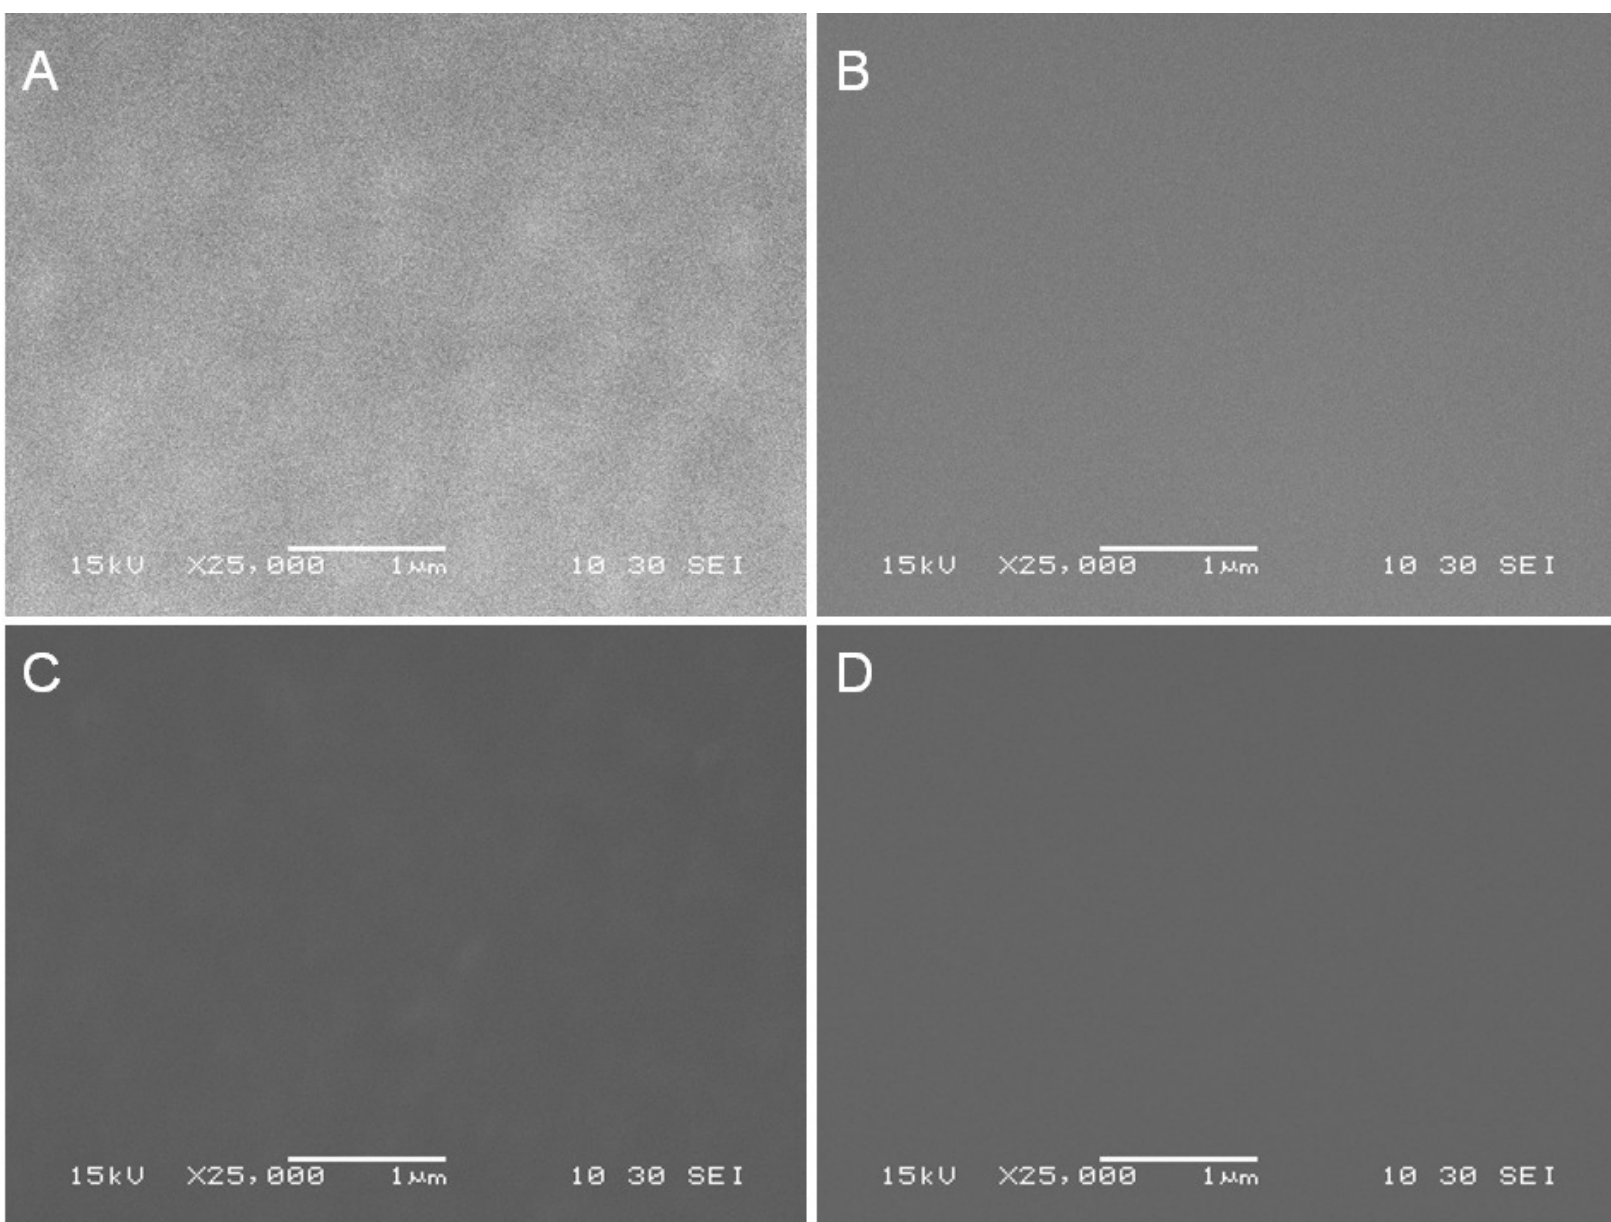

**Figure 4.** SEM micrographs (25000 X magnification) of the luminal surface of silicone catheter tubing segments with the tubing segments (A) as received from the manufacturer; (B) stored for 7 days at 37°C with no treatment; and treated with (C) saline or (D) PAD for 7 days at 37°C.

Table 1. Survivors (A) and regrowth (B) of ATCC-derived isolates following PAD treatment

(A)

| Lock Solution | Lock time (min) | Survivors ( $\log_{10}$ CFU/ml $\pm$ SD) |                                          |                                       |
|---------------|-----------------|------------------------------------------|------------------------------------------|---------------------------------------|
|               |                 | <i>MRSA</i> BAA-1707 <sup>a</sup>        | <i>P. aeruginosa</i> BAA-47 <sup>a</sup> | <i>C. albicans</i> 14053 <sup>a</sup> |
| Untreated     | 0               | 7.97 $\pm$ 0.04                          | 7.95 $\pm$ 0.03                          | 6.92 $\pm$ 0.23                       |
| Saline        | 60              | 7.58 $\pm$ 0.07                          | 7.70 $\pm$ 0.07                          | 6.56 $\pm$ 0.09                       |
| M-EDTA-25E    | 15              | 5.30 $\pm$ 0.01                          | 5.44 $\pm$ 0.04                          | 4.80 $\pm$ 0.36                       |
|               | 30              | 3.46 $\pm$ 0.10                          | 2.97 $\pm$ 0.17                          | 4.08 $\pm$ 0.18                       |
|               | 45              | <1                                       | 1.76 $\pm$ 0.44                          | 3.87 $\pm$ 0.15                       |
|               | 60              | <1                                       | <1                                       | 3.47 $\pm$ 0.23                       |
| PAD           | 15              | 4.91 $\pm$ 0.11                          | 3.92 $\pm$ 0.43                          | 4.90 $\pm$ 0.35                       |
|               | 30              | <1                                       | <1                                       | 3.21 $\pm$ 0.26                       |
|               | 45              | <1                                       | <1                                       | <1                                    |
|               | 60              | <1                                       | <1                                       | <1                                    |

(B)

| Lock Solution | Lock time (min) | Regrowth ( $\log_{10}$ CFU/ml $\pm$ SD) |                                          |                                       |
|---------------|-----------------|-----------------------------------------|------------------------------------------|---------------------------------------|
|               |                 | <i>MRSA</i> BAA-1707 <sup>a</sup>       | <i>P. aeruginosa</i> BAA-47 <sup>a</sup> | <i>C. albicans</i> 14053 <sup>a</sup> |
| Untreated     | 0               | 8.71 $\pm$ 0.09                         | 9.05 $\pm$ 0.02                          | 8.24 $\pm$ 0.09                       |
| Saline        | 60              | 7.33 $\pm$ 0.08                         | 7.95 $\pm$ 0.04                          | 7.97 $\pm$ 0.07                       |
| M-EDTA-25E    | 15              | 5.62 $\pm$ 0.05                         | 6.24 $\pm$ 0.15                          | 7.44 $\pm$ 0.13                       |
|               | 30              | 5.48 $\pm$ 0.02                         | 6.14 $\pm$ 0.14                          | 6.66 $\pm$ 0.28                       |
|               | 45              | <1                                      | 6.18 $\pm$ 0.10                          | 4.88 $\pm$ 0.03                       |
|               | 60              | <1                                      | 4.39 $\pm$ 0.02                          | 4.43 $\pm$ 0.04                       |
| PAD           | 15              | 3.13 $\pm$ 0.10                         | 6.40 $\pm$ 0.07                          | 6.76 $\pm$ 0.05                       |
|               | 30              | <1                                      | 6.27 $\pm$ 0.22                          | 3.69 $\pm$ 0.09                       |
|               | 45              | <1                                      | <1                                       | 1.91 $\pm$ 0.16                       |
|               | 60              | <1                                      | <1                                       | <1                                    |

<sup>a</sup>  $P \leq 0.001$  when compared with control;  $n = 3$ ; detection limit 1  $\log_{10}$  CFU/ml.





Table 2. Survivors (A) and regrowth (B) of clinical isolates following PAD treatment

(A)

| Lock Solution | Lock time (min) | Survivors ( $\log_{10}$ CFU/ml $\pm$ SD ) |                                          |                                        |
|---------------|-----------------|-------------------------------------------|------------------------------------------|----------------------------------------|
|               |                 | <i>MRSA</i> SO385 <sup>c</sup>            | <i>S. epidermidis</i> M0881 <sup>c</sup> | <i>C. albicans</i> P57072 <sup>c</sup> |
| Untreated     | 0               | 8.51 $\pm$ 0.17                           | 7.37 $\pm$ 0.13                          | 6.64 $\pm$ 0.22                        |
| Saline        | 60              | 6.66 $\pm$ 0.07                           | 5.10 $\pm$ 0.16                          | 5.62 $\pm$ 0.12                        |
| M-EDTA-25E    | 30              | 5.59 $\pm$ 0.19                           | 3.61 $\pm$ 0.12                          | 4.93 $\pm$ 0.13                        |
|               | 60              | 2.93 $\pm$ 0.20                           | 2.84 $\pm$ 0.27                          | 4.34 $\pm$ 0.34                        |
| PAD           | 30              | 2.67 $\pm$ 0.16                           | 2.47 $\pm$ 0.25                          | 3.01 $\pm$ 0.33                        |
|               | 60              | <1                                        | <1                                       | <1                                     |

(B)

| Lock Solution | Lock time (min) | Regrowth ( $\log_{10}$ CFU/ml $\pm$ SD ) |                                          |                                        |
|---------------|-----------------|------------------------------------------|------------------------------------------|----------------------------------------|
|               |                 | <i>MRSA</i> SO385 <sup>c</sup>           | <i>S. epidermidis</i> M0881 <sup>c</sup> | <i>C. albicans</i> P57072 <sup>c</sup> |
| Untreated     | 0               | 9.35 $\pm$ 0.07                          | 9.40 $\pm$ 0.13                          | 7.45 $\pm$ 0.16                        |
| Saline        | 60              | 9.10 $\pm$ 0.22                          | 8.82 $\pm$ 0.27                          | 7.42 $\pm$ 0.12                        |
| M-EDTA-25E    | 30              | 8.93 $\pm$ 0.10                          | 9.03 $\pm$ 0.15                          | 7.25 $\pm$ 0.17                        |
|               | 60              | 8.83 $\pm$ 0.14                          | 8.53 $\pm$ 0.08                          | 7.21 $\pm$ 0.22                        |
| PAD           | 30              | 8.94 $\pm$ 0.16                          | 7.84 $\pm$ 0.26                          | 6.55 $\pm$ 0.24                        |
|               | 60              | <1                                       | <1                                       | <1                                     |

<sup>c</sup>  $P \leq 0.05$  when compared with control;  $n = 3$ ; detection limit 1  $\log_{10}$  CFU/ml.



Table 3. PAD and M-EDTA-25E efficacy at different lock dwell times against *C. albicans*.

| Lock time<br>(min) | <i>C. albicans</i> 14053 ( $\log_{10}$ CFU/ml $\pm$ SD) |                       |                        |                       |
|--------------------|---------------------------------------------------------|-----------------------|------------------------|-----------------------|
|                    | M-EDTA-25E                                              |                       | PAD                    |                       |
|                    | Survivors <sup>a</sup>                                  | Regrowth <sup>a</sup> | Survivors <sup>a</sup> | Regrowth <sup>a</sup> |
| 0                  | 7.25 $\pm$ 0.23                                         | 8.13 $\pm$ 0.27       | 7.25 $\pm$ 0.23        | 8.13 $\pm$ 0.27       |
| 30                 | 5.89 $\pm$ 0.25                                         | 8.03 $\pm$ 0.22       | 5.25 $\pm$ 0.13        | 6.87 $\pm$ 0.19       |
| 60                 | 4.87 $\pm$ 0.11                                         | 6.60 $\pm$ 0.17       | < 1                    | < 1                   |
| 120                | 4.34 $\pm$ 0.13                                         | 6.20 $\pm$ 0.32       | < 1                    | < 1                   |
| 180                | 2.60 $\pm$ 0.28                                         | 5.90 $\pm$ 0.30       | < 1                    | < 1                   |
| 240                | < 1                                                     | 4.30 $\pm$ 0.27       | < 1                    | < 1                   |
| 300                | < 1                                                     | 2.99 $\pm$ 0.25       | < 1                    | < 1                   |
| 360                | < 1                                                     | <1                    | < 1                    | < 1                   |

<sup>a</sup>  $P \leq 0.001$  when compared with control;  $n = 3$ ; detection limit 1  $\log_{10}$  CFU/ml.
